# Supplementary material
Source: PubMed Central journal article supplement (PMC4136575)
Supplement: 1406123111_pnas.201406123SI.pdf [file 1406123111_pnas.201406123SI.pdf]

# Supporting Information

Choi et al. 10.1073/pnas.1406123111

## SI Materials and Methods

**Immunoblotting.** Western blotting was carried out according to standard protocols. Briefly, cells were lysed in radioimmuno-precipitation assay buffer containing a mixture of protease inhibitors (Roche) and Halt phosphatase inhibitor (Thermo Scientific). Lysates were separated on polyacrylamide gels and transferred to PVDF membranes. Antibodies used in this study are listed in Table S4.

**Real-Time Quantitative PCR.** RNA was isolated using the Nucleo-spin RNA II kit (Machery-Nagel). Superscript II (Invitrogen) was then used for first-strand cDNA synthesis, and target genes were quantified by SYBR GREEN quantitative PCR. Primers are described in Table S2. Values were normalized to the house-keeping gene *Ubc*.

**$\beta$ -Catenin Inhibitor Treatment.** Calphostin C (Enzo Life Sciences), PNU 74654 (Tocris Bioscience), Quercetin (Sigma), and Indomethacin (Sigma) were dissolved in DMSO. MYC lymphoma

cells were seeded in 96-well plates, and the percentage of viable cells after 72 h of drug treatment was assessed by staining with PrestoBlue (Life Technologies A-13261).

**Retroviral and Lentiviral Infection.** To generate retrovirus, the Phoenix-Ecotropic retroviral packaging line (Garry Nolan, Stanford University, Stanford, CA) was transfected using the calcium-phosphate method in media supplemented with 25  $\mu$ M chloroquine. To generate lentivirus, HEK 293T cells were transfected also using the calcium-phosphate method in media supplemented with 25  $\mu$ M chloroquine. Media were changed 12–24 h later to complete growth medium, and subsequently, retroviral or lentiviral supernatant was harvested 24 and 48 h later. Lymphoma cells were infected by resuspending in retroviral or lentiviral supernatant containing 5  $\mu$ g/mL polybrene and centrifuging at 2,500 rpm for 90 min in a Jouan C3i Centrifuge with a T20 rotor. Infected cells were then allowed to recover in fresh growth medium for 24 h before beginning phenotypic assays or drug selection.

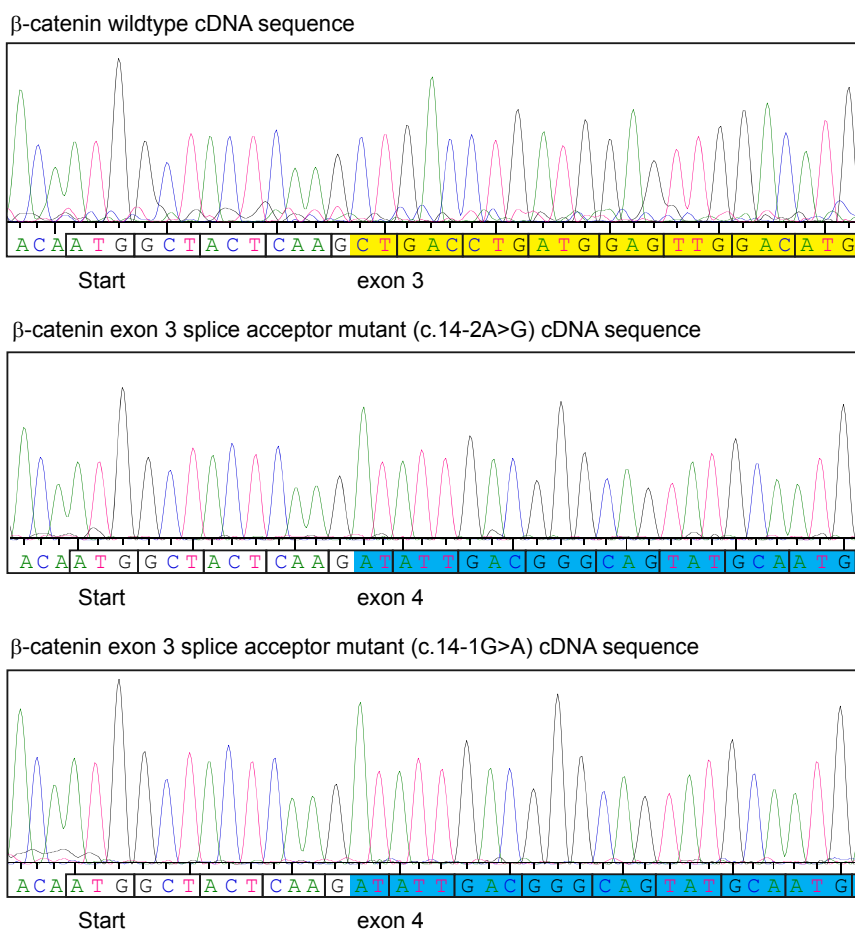

**Fig. S1.** Sequencing of  $\beta$ -catenin cDNA confirms deletion of exon 3 in MYC lymphoma cells with splice acceptor site mutations (related to Fig. 1).  $\beta$ -catenin cDNA was amplified from either (A) normal WT thymus or (B and C) MYC lymphoma cells with exon 3 splice acceptor site mutations. PCR products were directly sequenced using a primer upstream of the translational start site. Shown are sequence chromatograms with the start site and downstream included exon annotated.





**Table S1. Summary of  $\beta$ -catenin mutations identified in a panel of 30 E $\mu$ -tTA/tetO-MYC primary lymphomas**

| Number | Tumor ID | Mutation type | Nucleotide  | Amino acid                    |
|--------|----------|---------------|-------------|-------------------------------|
| 1      | B4282    | –             | –           | –                             |
| 2      | B4283    | Missense      | c.133T > G  | p.S45A                        |
| 3      | B4284    | –             | –           | –                             |
| 4      | B4329    | –             | –           | –                             |
| 5      | B4331    | Splice site   | c.14–1G > A | p.A5_A80del ( $\Delta$ exon3) |
| 6      | B6421    | –             | –           | –                             |
| 7      | B6422    | Missense      | c.121A > G  | p.T41A                        |
| 8      | B6678    | –             | –           | –                             |
| 9      | B6680    | –             | –           | –                             |
| 10     | B6867    | –             | –           | –                             |
| 11     | B7647    | Missense      | c.100G > A  | p.G34R                        |
| 12     | B8516    | –             | –           | –                             |
| 13     | C0826    | –             | –           | –                             |
| 14     | C0844    | –             | –           | –                             |
| 15     | C0846    | Splice site   | c.14–2A > G | p.A5_A80del ( $\Delta$ exon3) |
| 16     | C1194    | Splice site   | c.14–1G > A | p.A5_A80del ( $\Delta$ exon3) |
| 17     | C1296    | Missense      | c.94G > A   | p.D32N                        |
| 18     | C1369    | –             | –           | –                             |
| 19     | C1497    | –             | –           | –                             |
| 20     | C1571    | –             | –           | –                             |
| 21     | C1573    | –             | –           | –                             |
| 22     | C1630    | –             | –           | –                             |
| 23     | C1951    | Missense      | c.121A > G  | p.T41A                        |
| 24     | C2497    | Missense      | c.134C > T  | p.S45F                        |
| 25     | C2498    | –             | –           | –                             |
| 26     | C2978    | –             | –           | –                             |
| 27     | C3598    | –             | –           | –                             |
| 28     | D0289    | –             | –           | –                             |
| 29     | D0290    | Splice site   | c.14–2A > G | p.A5_A80del ( $\Delta$ exon3) |
| 30     | E0432    | Missense      | c.122C > A  | p.T41N                        |

**Table S2. Primers used in this study**

| Target                                                      | Primers                              |                                      |
|-------------------------------------------------------------|--------------------------------------|--------------------------------------|
|                                                             | Forward primer (5' $\rightarrow$ 3') | Reverse primer (5' $\rightarrow$ 3') |
| Primers for sequencing                                      |                                      |                                      |
| $\beta$ -catenin genomic PCR and sequencing (intron2-exon3) | GGTGAACCTGGCTTTTGGTGT                | TCCTTCAACCCACTTGTGCT                 |
| $\beta$ -catenin cDNA PCR                                   | GTGAGCTCGTGTCTGTGAA                  | CTTAAAGATGGCCAGCAAGC                 |
| $\beta$ -catenin cDNA sequencing                            | GAGCCGTCAGTGCAGGAG                   |                                      |
| Primers for qRT-PCR                                         |                                      |                                      |
| <i>Axin2</i>                                                | AACCTATGCCGGTTTCTCTA                 | GAGTGTAAGACTTGGTCCACC                |
| <i><math>\beta</math>-catenin</i>                           | TCCTTGAGACGCTAGATGAGG                | CGTTTAGCAGTTTGTGAGCTC                |
| <i>Bcl-xL</i>                                               | GACAAGGAGATGCAGGTATTGG               | TCCCGTAGAGATCCACAAAAGT               |
| <i>Bim</i>                                                  | CACCTGCTGTGTGCTTCTA                  | TTCAGTGAGCCATCTTGACG                 |
| <i>Enc1</i>                                                 | CTGTTTCATAAGTCTCTACGC                | CACCACTGAACATGGCTTCG                 |
| <i>Mecom</i>                                                | CTTTGAATCCAAGGCAGAGC                 | GACAGCATGTGCTTCTCCAA                 |
| <i>MYC</i> (transgenic)                                     | GGTCACACCCCTTCTCCCTTC                | AGCAGCTCGGTCCACCATC                  |
| <i>Runx2</i>                                                | AGAGTCAGATTACAGATCCCAGG              | TGGCTCTTCTACTGAGAGAGG                |
| <i>Ubc</i>                                                  | AGCCAGTGTACCACCAAG                   | ACCCAAGAACAAGCACAAGG                 |

**Table S3. shRNAs used in this study**

| shRNAs    | shRNA oligos (for cloning into LMP)                                                                    |
|-----------|--------------------------------------------------------------------------------------------------------|
| shControl | TGCTGTTGACAGTGAGCGATCTCGCTTGGGGCAGAGTAAGTAGTGAAGCCACAGATGTACTTACTCTCGCCCAAGCGAGAGTGCCTACTGCCTCGGA      |
| shBcat-2  | TGCTGTTGACAGTGAGCGACCAAGTGTGGGTGAATACTTTATAGTGAAGCCACAGATGTATAAAGTATTCACCCACACTGGCTGCCTACTGCCTCGGA     |
| shBcat-3  | TGCTGTTGACAGTGAGCGAATGCAGAATACAAATGATGTATAGTGAAGCCACAGATGTATACATCATTTGTATTCTGCATGTGCCTACTGCCTCGGA      |
| shBcat-4  | TGCTGTTGACAGTGAGCGACCAAGTCAAGCTCAGCGACTTGTTCATAGTGAAGCCACAGATGTATTGAACAAGTCGCTGACTTGGGTGCCTACTGCCTCGGA |

**Table S4. Antibodies used in this study**

| Antibodies        |                   |                                |
|-------------------|-------------------|--------------------------------|
| Target            | Clone/catalog no. | Company                        |
| $\alpha$ -tubulin | T9026             | Sigma                          |
| $\beta$ -actin    | AM1829b           | Abgent                         |
| $\beta$ -catenin  | 610154            | BD Biosciences                 |
| Bcl-xL            | 610209            | BD Biosciences                 |
| Bim               | 2819              | Cell Signaling Technology      |
| Cleaved caspase-3 | 9661              | Cell Signaling Technology      |
| ICAT              | FL-81/sc-99240    | Santa Cruz Biotechnology, Inc. |
| Ki-67             | 556003            | BD Biosciences                 |
| MYC               | 9E10              | Calbiochem                     |
| Vinculin          | SAB4200080        | Sigma                          |
